# Supplementary material
Source: publisher site journal article supplement (https://www.dovepress.com/get_supplementary_file.php?f=295801.xlsx)
Supplement: Supplementary file 1 [file get_supplementary_file.php]

## Sheet: Sheet1
Supplement Table 1: To investigate the potential sources of E. coli RS1231S isolate, we searched several genomes of MCR-1.1-producing E. coli isolate among animal, human and the environment from the publicly available database
Isolate	ST	adk	fumC	gyrB	icd	mdh	purA	recA	Clonal Complex	plasmid mcr1	ISApl1	Continent	Country	Source	Origin	Anatomical site	Status	Isolation year	Type	Database*	Accesion number	Original reference
413040864	1112	10	11	5	10	8	1	2	/	IncX4	No	Europe	Denmark	animal	chicken meat	food	healthy	2013	raw reads	ENA	ERR1399394	Hasman et al. Detection of mcr-1 encoding plasmid-mediated colistin-resistant Escherichia coli isolates from human bloodstream infection and imported chicken meat, Denmark 2015. EuroS 2015
EC590	744	10	11	135	8	8	8	2	CC10	not found	na	Asia	Malaysia	human	patient	UTI	diseased	2013	pre-assembled	NCBI	CP016182	Yu et al. Emergence of mcr-1-mediated colistin resistance in Escherichia coli in Malaysia IJAC 2016
CBT1023	744	10	11	135	8	8	8	2	CC10	IncHI2	No	Africa	Tunesia	human	healthy traveller	feces	healthy	2013	raw reads	ENA	SAME104030442	Arcilla et al. Dissemination of the mcr-1 colistin resistance gene. Lancet Infect Dis 2016;
CBT1531	744	10	11	135	8	8	8	2	CC10	IncI2	No	Asia	China	human	healthy traveller	feces	healthy	2013	raw reads	ENA	SAME104030445	Arcilla et al. Dissemination of the mcr-1 colistin resistance gene. Lancet Infect Dis 2016;
H226B	167	10	11	4	8	8	13	2	CC10	IncHI1	No	Europe	Switzerland	environment	vegetables imported from Thailand		environment	2014	pre-assembled	NCBI	KX129784	Zurfuh et al. Occurrence of the Plasmid-Borne mcr-1 Colistin Resistance Gene in Extended-Spectrum-β-Lactamase-Producing Enterobacteriaceae in River Water and Imported Vegetable Samples in Switzerland. AAC 2016
EC2.1	3489	236	7	4	8	8	8	2	CC10	IncHI1A/IncHI1B/IncFIA	Yes	Asia	Malaysia	animal	Chicken	heart and liver	unknown	2013	pre-assembled	NCBI	PRJNA269670	Petrillo M, Angers-Loustau A, Kreysa J: Possible genetic events producing colistin resistance gene mcr-1. The Lancet Infectious diseases 2016, 16(3):280.
MT31F.G1	93	6	11	4	10	7	8	6	CC168	IncHI2	Yes	Asia	Vietnam	human	Farmer	rectal swab	healthy	2012-2013	raw reads	ENA	PRJEB14873	Nguyen T.V. et al., Zoonotic transmission of the mcr-1 colistin resistance gene from non-intensive poultry farms in Vietnam, EID 2017 (in press)
CT48C.G2	2690	6	11	4	8	258	8	2	CC10	not found	Yes	Asia	Vietnam	animal	Chicken	boot swab	environment	2012-2013	raw reads	ENA	PRJEB14873	Nguyen T.V. et al., Zoonotic transmission of the mcr-1 colistin resistance gene from non-intensive poultry farms in Vietnam, EID 2017 (in press)
EC13	410	6	4	12	1	20	18	7	CC88	IncI2	No	Asia	Malaysia	environment	Water	Water	environment	2013	pre-assembled	NCBI	PRJNA269669	Petrillo M, Angers-Loustau A, Kreysa J: Possible genetic events producing colistin resistance gene mcr-1. The Lancet Infectious diseases 2016, 16(3):280.
SC144	2253	6	11	4	10	7	7	6	CC168	IncHI2	Unknow	Asia	China	environment	Slaugher house	Soil	environment	2016	pre-assembled	NCBI	PQIZ0000000.1	Shen C, et al. Dynamics of mcr-1 prevalence and mcr-1-positive Escherichia coli after the cessation of colistin use as a feed additive for animals in China: a prospective cross-sectional and whole genome sequencing-based molecular epidemioligical study
E4	3014	303	41	1	8	8	8	6	/	Incp0111	Unknow	Europe	UK	animal	pig	intestine	diseased	na	raw reads	ENA	PRJEB12519	Anjum et al. Colistin resistance in Salmonella and Escherichia coli isolates from a pig farm in Great Britain. JAC 2016
SA26	68	33	26	2	31	5	16	19	/	IncHI2	Yes	Africa	Saudi Arabia	human	patient	Blood	diseased	2012	pre-assembled	NCBI	KU743384	Sonnevend et al. Plasmid-mediated colistin resistance in Escherichia coli from the Arabian Peninsula. IJID 2016.
mcr1_204	1851	170	40	93	13	17	28	166	/	IncX4	No	Europe	Germany	human	patient	urine	diseased	2016	raw reads	ENA	ERR1562562	Fritzenwanker M, Imirzalioglu C, Gentil K, Falgenhauer L, Wagenlehner FM, Chakraborty T: Incidental detection of a urinary Escherichia coli isolate harbouring mcr-1 of a patient with no history of colistin treatment. Clinical microbiology and infection : the official publication of the European Society of Clinical Microbiology and Infectious Diseases 2016.
BB1290	19	15	16	10	15	18	12	11	/	IncI2	No	South-America	Venezuela	human	human	feces	diseased	2015	raw reads	NCBI	SRR3745274	Delgado-Blas JF, Ovejero CM, Abadia-Patino L, Gonzalez-Zorn B: Coexistence of mcr-1 and blaNDM-1 in Escherichia coli from Venezuela. Antimicrobial agents and chemotherapy 2016, 60(10):6356-6358.
BA77	224	6	4	33	16	11	8	6	/	IncI2	No	Africa	Bahrain	human	patient	Urine	diseased	2015	pre-assembled	NCBI	KX013539	Sonnevend et al. Plasmid-mediated colistin resistance in Escherichia coli from the Arabian Peninsula. IJID 2016.
CBT1454	641	9	6	33	131	24	8	7	/	IncX4	No	Asia	China	human	healthy traveller	feces	healthy	2013	raw reads	ENA	SAME104030444	Arcilla et al. Dissemination of the mcr-1 colistin resistance gene. Lancet Infect Dis 2016;
OW3E1	359	43	41	15	90	11	8	6	/	IncX4	No	Europe	Switzerland	environment	water	Water	environment	2012	pre-assembled	NCBI	KX129783.1	Zurfuh et al. Occurrence of the Plasmid-Borne mcr-1 Colistin Resistance Gene in Extended-Spectrum-β-Lactamase-Producing Enterobacteriaceae in River Water and Imported Vegetable Samples in Switzerland. AAC 2016
SC135	101	43	41	15	18	11	7	6	CC101	IncHI2	Unknow	Asia	China	environment	Slaugher house	Water	environment	2016	pre-assembled	NCBI	PQHV00000000.1	Shen C, et al. Dynamics of mcr-1 prevalence and mcr-1-positive Escherichia coli after the cessation of colistin use as a feed additive for animals in China: a prospective cross-sectional and whole genome sequencing-based molecular epidemioligical study
CT67C.C1	101	43	41	15	18	11	7	6	CC101	not found	Yes	Asia	Vietnam	animal	Chicken	boot swab	environment	2012-2013	raw reads	ENA	PRJEB14873	Nguyen T.V. et al., Zoonotic transmission of the mcr-1 colistin resistance gene from non-intensive poultry farms in Vietnam, EID 2017 (in press)
CG54F.G2	10	10	11	4	8	8	8	2	CC10	not found	Yes	Asia	Vietnam	human	Farmer	rectal swab	healthy	2012-2013	raw reads	ENA	PRJEB14873	Nguyen T.V. et al., Zoonotic transmission of the mcr-1 colistin resistance gene from non-intensive poultry farms in Vietnam, EID 2017 (in press)
